# Supplementary material for: Modelling tropical forest responses to drought and El Niño with a stomatal optimization model based on xylem hydraulics
Source: Philos Trans R Soc Lond B Biol Sci. 2018 Oct 8;373(1760):20170315. doi: 10.1098/rstb.2017.0315 (PMC6178424; doi:10.1098/rstb.2017.0315)
Supplement: BETA code [file rstb20170315supp3.r]

# Function to compute stomatal conductance from enviromental variables and plant traits according with the beta-function approach (Cox et al 1998; Clark et al 2011)
# This code uses the Collatz et al (1991) model with the leaf internal co2 concentration given by Jacobs (1984) equation to compute an unstressed photosynthesis value
# The beta function from Cox et al (1998) is used to simulate the soil moisture effect on stomatal conductance
# See full description in Eller et al (2018) 

# This function returns a numeric vector with the wilting and critical theta from the Cox et al (1998) beta function.
# The arguments are the parameters from Clapp & Hornberger (1978) equation (ksr_max, Ps_max, b). See Eller et al (2018) for details.
find_thetas <- function(Ps_max,theta_max,b) {
  
  Ps <- seq(0,-50, length.out = 10000)
  W = ( Ps / Ps_max ) ^ (1/-b)
  theta = W * theta_max
  
  theta_w = theta[which.min(abs(Ps+1.5))]
  theta_c = theta[which.min(abs(Ps+0.033))]
  
  return(c(theta_w,theta_c))
}

# Collatz et al 1991 C3 photosynthesis model following Clark et al (2011) 
# This function returns a numeric "A" vector with lenght equal to the lengths of the argument input vectors 
# All enviromental arguments can be numeric vectors, the photosynthetic parameters are single numeric values
# See the "Example sox run" section below for the meaning and units for each argument
Photofun.vec <- function(IPAR, Tc, Oa, Ci, vcmax25, Tup, Tlw, alfa, wPAR, beta1 = 0.83, beta2 = 0.93) {
  
  #Vcmax temperature response
  Q10leaf = 2
  Vcmax = vcmax25 * (Q10leaf ^ (0.1 * (Tc - 25))) / ((1 + exp(0.3 * (Tc - Tup))) * (1 + exp(0.3 * (Tlw - Tc))))
  
  #Photocompensation
  Q10rs = 0.57
  photocomp = Oa / (2 * 2600 * (Q10rs ^ (0.1 * (Tc - 25))))
  
  #Kc & Ko 
  Q10Kc = 2.1
  Kc = 30 * (Q10Kc ^ (0.1 * (Tc - 25)))
  Q10Ko = 1.2
  Ko = 30000 * (Q10Ko ^ (0.1 * (Tc - 25)))
  
  #A  
  Ac = Vcmax * ((Ci - photocomp) / (Ci + Kc * (1 + Oa / Ko)))
  Al = alfa * (1 - wPAR) * IPAR * ((Ci - photocomp) / (Ci + 2 * photocomp))
  Ae = 0.5 * Vcmax
  
  #Co-limitation
  
  x = Re(mapply(function (Al, Ac, beta1) polyroot(c(Al*Ac,-(Al+Ac),beta1)), Al,Ac,beta1))
  Acol1 = do.call(pmin,lapply(1:nrow(x), function(i)x[i,]))
  x2 = Re(mapply(function (Acol1, Ae, beta2) polyroot(c(Acol1*Ae,-(Acol1+Ae),beta2)), Acol1,Ae,beta2))
  Acol2 = do.call(pmin,lapply(1:nrow(x2), function(i)x2[i,]))
  
  #output
  return(Acol2)
  
} 

# Beta model arguments: 
# Dcrit and f0 are parameters from jacobs (1984) equation 
# Need soil pars to calculate theta_w and theta_c from Cox et al (1998) 
# beta: If "ON" (default) it uses the beta function from Cox et al (1998). "OFF" assumes optimum soil moisture.
# Photo: Dataframe containing the parameters of the photosynthesis model (vcmax25,Tup,Tlw,alfa,wPAR,beta1,beta2)
# Env: Dataframe containing the environmental driving data (IPAR, Ta, D, Ps, Oa, Ca, Pa)
BETA <- function(Dcrit, f0, beta = "ON", theta_max, Ps_max, b, Photo, Env) {
  
  # Creating output dataframe
  out <- data.frame(timestep = 1:length(Env$Ta),# same units of the enviromental input dataframe
                    A = rep(NA, length(Env$Ta)),# Photosynthesis without soil moisture stress adjustments (mol m-2 s-1)
                    Abet = rep(NA, length(Env$Ta)),# Photosynthesis adjusted for soil moisture stress with beta factor (mol m-2 s-1)
                    Ci = rep(NA, length(Env$Ta)),# Leaf internal CO2 partial pressure (Pa)
                    beta = rep(NA, length(Env$Ta)),# Beta factor from Beta function model (unitless)
                    Gc = rep(NA, length(Env$Ta)),# Stomatal conductance to CO2 (mol m-2 s-1)
                    E = rep(NA, length(Env$Ta)))# Transpiration (mol m-2 s-1)
  
  
  # Calculating volumetric soil moisture from Ps 
  W = ( Env$Ps / Ps_max ) ^ (1/-b)
  theta = W * theta_max

  # Finding theta_wilting and theta_critical (Cox et al 1998)  
  theta_w = find_thetas(Ps_max,theta_max,b)[1]
  theta_c = find_thetas(Ps_max,theta_max,b)[2]
    
  # Calculating Ci with jacobs (1984)
  Q10rs = 0.57
  photocomp = Env$Oa / (2 * 2600 * (Q10rs ^ (0.1 * (Env$Ta - 25))))
  out$Ci = f0 * (1 - Env$D/Dcrit) * (Env$Ca - photocomp) + photocomp

  # Run photo model
  out$A = Photofun.vec(IPAR = Env$IPAR, Tc = Env$Ta, Oa = Env$Oa, Ci = out$Ci,
                       vcmax25 = Photo$vcmax25, Tup = Photo$Tup, Tlw = Photo$Tlw, 
                       alfa = Photo$alfa, wPAR = Photo$wPAR, beta1 = Photo$beta1, beta2 = Photo$beta2)
    
    # Modifying photo with beta 
    if (beta == "OFF") {
      
      out$beta = 1
      out$Abet = out$A
      
      } else {
      
        out$beta = ifelse(theta > theta_c, 1,
                          ifelse(theta < theta_c & theta > theta_w, (theta - theta_w)/(theta_c - theta_w),
                                 0))
        out$Abet = out$A * out$beta
                                 
      }
    
    # Gc
    out$Gc = out$Abet/((Env$Ca -  out$Ci)/Env$Pa) 
    
    # E
    out$E = out$Gc * 1.6 * Env$D

  # output
  return(out)
  
}

# Example beta model run
# Setting enviromental data dataframes
Env1 <- data.frame(IPAR = rep(0.002, 10e1), # Photosynthetic active radiation incident on the leaf (mol m-2 s-1)
                   Ta = rep(20, 10e1), # Air temperature (C)
                   D = seq(0.5/100,5/100, length.out = 10e1), # Leaf to air vapour pressure deficit (mol mol-1)
                   Ps = rep(-0.1, 10e1), # Water potential on the soil close to the roots (MPa)
                   Oa = rep(21000, 10e1), # O2 partial pressure (Pa)
                   Ca = rep(40, 10e1), # CO2 partial pressure (Pa)
                   Pa = rep(101325, 10e1)) # Atmospheric pressure (Pa)

Env2 <- data.frame(IPAR = rep(0.002, 10e1), 
                   Ta = rep(20, 10e1), 
                   D = rep(0.5/100, 10e1), 
                   Ps = seq(-0.1,-5, length.out = 10e1), 
                   Oa = rep(21000, 10e1), 
                   Ca = rep(40, 10e1), 
                   Pa = rep(101325, 10e1)) 

Env3 <- data.frame(IPAR = seq(0.00001,0.002, length.out =10e1),
                   Ta = rep(20, 10e1), 
                   D = rep(0.5/100,10e1), 
                   Ps = rep(-0.1, 10e1), 
                   Oa = rep(21000, 10e1),
                   Ca = rep(40, 10e1), 
                   Pa = rep(101325, 10e1))

Env4 <- data.frame(IPAR = rep(0.002, 10e1),
                   Ta = rep(20, 10e1), 
                   D = rep(0.5/100,10e1),
                   Ps = rep(-0.1, 10e1), 
                   Oa = rep(21000, 10e1),
                   Ca = seq(20,120, length.out = 10e1), 
                   Pa = rep(101325, 10e1)) 

# Plant photosynthetic parameters dataframe
Photo <- data.frame(vcmax25 = 0.0001, # Rubisco maximum carboxylation rate (mol m-2 s-1)
                    alfa = 0.1, # quantum efficicency (mol mol-1)
                    wPAR = 0.15, # leaf scattering coefficient (unitless)
                    Tup = 50, # high temperature photosynthesis range (C)
                    Tlw = 10, # low temperature photosynthesis range (C)
                    beta1=0.83, # co-limitation factor (unitless)
                    beta2=0.93) # co-limitation factor (unitless)

# Beta parameters
Dcrit = 0.09 # Critical humidity deficit (mol mol-1)
f0 = 0.875 # Empirical stomatal conductance parameter from jacobs (1994) equation (unitless)
theta_max= 0.5 # Saturated soil volumetric water content (m3 m-3)
Ps_max = -0.01 # Maximum soil water potential (MPa)
b = 10 # Empirical parameter from Clapp & Hornberger (1978) equation (unitless)

# run beta model
out1 <- BETA(Dcrit = Dcrit, f0 = f0, theta_max = theta_max, Ps_max = Ps_max, b = b, Photo = Photo, Env = Env1)
out2 <- BETA(Dcrit = Dcrit, f0 = f0, theta_max = theta_max, Ps_max = Ps_max, b = b, Photo = Photo, Env = Env2)
out3 <- BETA(Dcrit = Dcrit, f0 = f0, theta_max = theta_max, Ps_max = Ps_max, b = b, Photo = Photo, Env = Env3)
out4 <- BETA(Dcrit = Dcrit, f0 = f0, theta_max = theta_max, Ps_max = Ps_max, b = b, Photo = Photo, Env = Env4)

# plotting
par(mfrow = c(2,2))
plot(out1$Gc ~ Env1$D, type = "l", 
     ylab = expression(g[c]~(mol~m^-2~s^-1)),
     xlab = expression(D~(mol~mol^-1)))
plot(out2$Gc ~ Env2$Ps, type = "l",
     ylab = expression(g[c]~(mol~m^-2~s^-1)),
     xlab = expression(Psi[s]~(mol~mol^-1)))
plot(out3$Gc ~ Env3$IPAR,type = "l",
     ylab = expression(g[c]~(mol~m^-2~s^-1)),
     xlab = expression(I[par]~(mol~m^-2~s^-1)))
plot(out4$Gc ~ Env4$Ca,type = "l",
     ylab = expression(g[c]~(mol~m^-2~s^-1)),
     xlab = expression(c[a]~(Pa)))
par(mfrow = c(1,1))

# References:
# Christoffersen et al (2016) Geoscientific Model Development 9: 4227-4255
# Clapp & Hornberger (1978) Water resources research 14: 601-604
# Clark et al (2011) Geoscientific Model Development 4: 701-722
# Collatz et al (1991) Agricultural and Forest meteorology 54: 107-136
# Cox et al (1998) Journal of Hydrology 212: 79-94
# Eller et al (2018) Proceedings of the Royal Society B 
# Jacobs (1994) PhD Thesis. Wageningen Agricultural University.
